# Supplementary material
Source: PubMed Central journal article supplement (PMC4116146)
Supplement: bi500763u_si_002.pdf [file bi500763u_si_002.pdf]

Table S-1. List of labeled ions in HeLa cells cultured for 48 hours in 50% U-<sup>13</sup>C glucose. Compound\_m/z represents the m/z of the base peak of each isotopologue group.

| Compound_m/z | RT(min) | p_value  | Compound_m/z | RT(min) | p_value  |
|--------------|---------|----------|--------------|---------|----------|
| 85.0296      | 35.8    | 1.36E-02 | 198.0406     | 39.6    | 8.71E-05 |
| 87.0087      | 35.8    | 5.53E-05 | 200.0563     | 8.6     | 3.61E-04 |
| 88.0402      | 23.8    | 1.14E-05 | 210.0883     | 26.5    | 5.48E-03 |
| 88.0404      | 29.0    | 1.19E-03 | 211.0008     | 36.3    | 7.08E-05 |
| 96.0091      | 34.6    | 2.04E-03 | 211.0010     | 30.7    | 3.04E-03 |
| 98.0247      | 20.3    | 2.08E-04 | 214.0489     | 17.9    | 7.07E-03 |
| 102.0558     | 34.6    | 1.76E-02 | 214.0721     | 39.6    | 1.74E-04 |
| 102.0559     | 24.1    | 5.70E-03 | 216.0512     | 39.6    | 1.34E-03 |
| 104.0357     | 17.5    | 2.48E-03 | 221.0126     | 19.6    | 3.37E-02 |
| 107.0364     | 9.6     | 9.58E-03 | 226.9418     | 36.1    | 6.42E-03 |
| 110.0244     | 8.6     | 3.40E-05 | 226.9686     | 19.5    | 3.11E-02 |
| 110.0247     | 39.6    | 7.80E-04 | 227.0648     | 17.2    | 4.14E-01 |
| 111.0087     | 39.6    | 1.92E-03 | 228.0989     | 26.5    | 3.06E-03 |
| 111.0089     | 35.8    | 9.94E-04 | 238.0333     | 39.6    | 3.47E-03 |
| 115.0513     | 28.8    | 8.54E-04 | 240.0517     | 39.6    | 7.59E-04 |
| 128.0352     | 39.6    | 1.56E-03 | 241.0119     | 30.2    | 2.03E-03 |
| 128.0353     | 24.0    | 2.88E-02 | 241.0727     | 15.6    | 3.57E-03 |
| 128.0353     | 26.5    | 1.47E-02 | 242.0306     | 39.6    | 2.89E-02 |
| 128.0714     | 39.6    | 7.54E-03 | 242.0801     | 15.5    | 1.10E-03 |
| 129.0191     | 35.7    | 9.37E-05 | 243.0625     | 8.4     | 3.19E-04 |
| 130.0508     | 29.0    | 1.01E-03 | 244.0652     | 8.3     | 1.18E-05 |
| 132.0301     | 23.8    | 6.45E-04 | 245.0432     | 21.5    | 9.92E-04 |
| 133.0141     | 29.4    | 5.09E-03 | 245.0687     | 8.2     | 7.18E-03 |
| 134.0470     | 7.1     | 2.07E-02 | 252.0877     | 19.7    | 2.36E-01 |
| 134.0470     | 8.3     | 1.83E-02 | 253.0929     | 12.8    | 1.99E-04 |
| 134.0472     | 5.5     | 1.51E-02 | 254.0784     | 26.5    | 9.10E-04 |
| 134.0473     | 2.9     | 4.81E-03 | 255.2339     | 15.2    | 3.62E-01 |
| 134.0474     | 9.6     | 7.61E-03 | 258.0618     | 39.6    | 6.58E-03 |
| 135.0299     | 21.0    | 2.36E-04 | 259.0162     | 22.7    | 8.07E-03 |
| 140.0355     | 8.7     | 1.00E-03 | 259.0226     | 29.8    | 2.80E-04 |
| 144.0664     | 28.9    | 2.29E-03 | 261.0734     | 28.8    | 1.04E-05 |
| 145.0620     | 17.1    | 1.29E-02 | 262.0878     | 26.5    | 1.74E-02 |
| 146.0458     | 34.6    | 4.14E-04 | 267.0738     | 16.3    | 1.07E-04 |
| 146.0459     | 24.0    | 3.94E-05 | 267.0926     | 9.6     | 7.47E-03 |
| 147.0295     | 35.8    | 1.06E-02 | 271.0572     | 34.7    | 9.68E-01 |
| 148.9911     | 19.5    | 7.51E-04 | 272.0889     | 32.6    | 1.08E-03 |
| 150.9801     | 36.4    | 2.62E-04 | 272.0892     | 26.5    | 9.01E-04 |
| 152.0716     | 39.6    | 5.61E-02 | 272.1251     | 19.4    | 2.90E-04 |
| 155.0462     | 34.6    | 6.51E-04 | 272.9570     | 37.8    | 2.09E-04 |
| 155.0823     | 26.5    | 6.03E-02 | 273.0381     | 29.7    | 2.88E-04 |
| 166.0179     | 21.9    | 3.35E-04 | 275.0889     | 34.0    | 5.99E-03 |
| 168.9904     | 36.4    | 5.58E-04 | 280.9791     | 19.5    | 5.80E-02 |
| 170.0818     | 39.6    | 1.04E-02 | 282.0843     | 14.8    | 4.19E-04 |
| 172.0613     | 39.6    | 2.42E-03 | 283.2653     | 14.8    | 2.90E-01 |
| 174.0409     | 29.0    | 5.67E-05 | 284.0412     | 39.6    | 1.62E-04 |
| 182.0458     | 34.6    | 2.72E-02 | 285.0730     | 34.6    | 1.52E-05 |
| 186.0385     | 17.6    | 4.13E-03 | 286.0603     | 21.9    | 4.03E-04 |
| 188.0565     | 28.8    | 3.68E-05 | 286.9356     | 19.5    | 2.50E-02 |
| 191.0196     | 35.8    | 1.94E-04 | 287.0785     | 34.6    | 2.48E-04 |
| 193.0165     | 9.9     | 1.74E-05 | 288.0661     | 26.5    | 9.18E-04 |

| Compound_m/z | RT(min) | p_value  | Compound_m/z | RT(min) | p_value  |
|--------------|---------|----------|--------------|---------|----------|
| 195.0507     | 22.5    | 3.22E-04 | 289.0331     | 29.8    | 4.74E-04 |
| 196.0225     | 29.0    | 3.88E-04 | 298.9902     | 19.5    | 3.70E-01 |
| 196.0615     | 39.6    | 1.49E-03 | 300.0010     | 36.3    | 4.27E-04 |
| 300.0414     | 30.1    | 4.12E-02 | 378.0980     | 29.8    | 1.22E-02 |
| 301.0652     | 23.9    | 2.08E-02 | 380.0290     | 39.6    | 1.68E-04 |
| 302.0522     | 39.6    | 4.16E-05 | 381.0068     | 8.8     | 4.48E-03 |
| 302.0996     | 28.7    | 1.56E-03 | 381.9712     | 36.3    | 2.58E-04 |
| 303.0836     | 34.6    | 1.07E-03 | 382.9958     | 30.8    | 1.78E-03 |
| 305.0182     | 37.7    | 6.22E-03 | 382.9958     | 37.7    | 2.90E-03 |
| 305.0681     | 32.6    | 3.86E-03 | 383.1151     | 18.8    | 9.27E-05 |
| 305.5705     | 32.6    | 9.98E-03 | 384.9840     | 36.3    | 1.14E-03 |
| 306.0763     | 32.6    | 6.11E-03 | 384.9846     | 30.0    | 3.14E-04 |
| 306.0770     | 26.5    | 5.40E-03 | 384.9849     | 37.7    | 1.29E-05 |
| 313.1131     | 17.0    | 8.23E-02 | 390.9929     | 24.0    | 8.49E-02 |
| 315.0805     | 24.0    | 1.46E-04 | 401.0061     | 30.8    | 1.32E-03 |
| 317.0991     | 34.5    | 3.17E-04 | 402.0111     | 36.6    | 1.33E-02 |
| 320.0628     | 39.6    | 9.85E-04 | 402.9951     | 36.3    | 1.61E-04 |
| 321.0500     | 30.1    | 5.95E-06 | 402.9954     | 37.7    | 5.48E-04 |
| 322.0452     | 30.2    | 2.04E-07 | 404.0334     | 9.5     | 1.57E-05 |
| 323.0285     | 36.3    | 1.64E-05 | 404.1313     | 38.1    | 3.53E-02 |
| 323.0285     | 37.7    | 2.24E-04 | 405.1467     | 15.6    | 1.12E-02 |
| 323.0289     | 30.7    | 1.53E-05 | 406.9667     | 24.0    | 7.44E-01 |
| 324.9454     | 36.4    | 2.68E-03 | 408.0120     | 37.8    | 1.68E-01 |
| 325.0656     | 34.6    | 1.91E-04 | 409.1101     | 34.6    | 4.09E-06 |
| 326.0560     | 7.1     | 1.04E-01 | 421.1757     | 15.5    | 9.23E-04 |
| 326.0570     | 9.5     | 1.11E-05 | 421.2264     | 12.4    | 1.51E-01 |
| 328.0463     | 37.8    | 1.21E-04 | 422.0879     | 35.6    | 3.40E-04 |
| 328.0586     | 26.5    | 2.22E-02 | 423.9928     | 36.7    | 7.14E-04 |
| 328.2316     | 15.0    | 9.14E-03 | 424.0332     | 30.8    | 4.60E-04 |
| 329.2340     | 15.2    | 3.72E-02 | 424.1302     | 9.6     | 5.62E-04 |
| 331.0549     | 24.0    | 1.21E-01 | 424.9768     | 37.6    | 3.76E-05 |
| 333.0597     | 23.2    | 3.12E-05 | 426.0137     | 31.1    | 3.94E-03 |
| 334.1262     | 19.6    | 1.38E-04 | 426.0226     | 37.9    | 2.33E-07 |
| 337.0624     | 24.0    | 1.99E-01 | 427.1272     | 12.7    | 1.06E-02 |
| 341.0391     | 34.6    | 1.02E-03 | 427.9886     | 37.6    | 3.90E-07 |
| 342.0444     | 39.6    | 7.18E-03 | 428.1096     | 15.5    | 1.50E-01 |
| 344.0325     | 26.5    | 5.75E-03 | 432.0478     | 17.5    | 4.90E-02 |
| 345.1436     | 15.7    | 6.56E-02 | 434.0262     | 3.7     | 2.21E-04 |
| 346.0560     | 37.9    | 2.37E-06 | 434.0265     | 5.4     | 9.28E-07 |
| 346.0561     | 30.7    | 2.19E-05 | 435.1363     | 14.8    | 2.01E-03 |
| 348.0875     | 29.8    | 7.81E-04 | 436.2844     | 12.3    | 3.16E-03 |
| 350.0448     | 17.5    | 1.43E-02 | 437.0071     | 37.9    | 2.35E-03 |
| 351.1047     | 29.0    | 3.01E-04 | 439.9962     | 39.6    | 6.39E-03 |
| 356.0491     | 5.5     | 5.42E-04 | 440.9508     | 37.7    | 2.01E-03 |
| 356.0495     | 3.6     | 3.07E-04 | 442.0171     | 40.0    | 3.49E-06 |
| 358.0181     | 39.6    | 2.75E-04 | 442.1690     | 14.2    | 3.22E-02 |
| 362.0049     | 29.9    | 1.16E-04 | 442.1931     | 13.7    | 5.32E-03 |
| 362.0188     | 39.6    | 2.84E-05 | 444.0694     | 35.6    | 3.10E-03 |
| 362.0510     | 33.2    | 1.76E-05 | 444.9517     | 37.7    | 1.42E-04 |
| 364.9125     | 19.5    | 2.72E-01 | 447.3116     | 15.5    | 4.85E-02 |
| 366.1088     | 12.6    | 3.12E-02 | 447.9620     | 37.7    | 3.07E-05 |
| 367.1063     | 12.6    | 1.07E-02 | 448.0040     | 37.9    | 6.43E-05 |
| 368.0369     | 30.7    | 9.81E-03 | 450.2630     | 12.6    | 2.73E-01 |
| 368.1235     | 12.1    | 9.23E-02 | 452.2788     | 12.5    | 1.81E-04 |
| 369.1217     | 12.1    | 5.07E-02 | 453.0209     | 30.1    | 5.56E-05 |
| 370.1265     | 12.3    | 1.48E-02 | 458.0063     | 39.6    | 2.26E-03 |

| Compound_m/z | RT(min) | p_value  | Compound_m/z | RT(min) | p_value  |
|--------------|---------|----------|--------------|---------|----------|
| 370.1387     | 11.9    | 1.47E-04 | 460.0433     | 35.6    | 9.29E-02 |
| 371.1369     | 12.0    | 2.28E-05 | 460.1865     | 15.3    | 5.98E-01 |
| 371.1593     | 15.2    | 2.37E-02 | 462.9618     | 37.7    | 3.39E-02 |
| 374.1760     | 2.2     | 2.28E-02 | 463.9766     | 37.9    | 1.33E-03 |
| 464.0005     | 9.6     | 1.25E-03 | 555.2736     | 15.5    | 1.78E-02 |
| 467.9788     | 37.8    | 1.47E-05 | 558.0016     | 36.3    | 2.70E-05 |
| 468.1297     | 32.2    | 6.40E-04 | 558.9497     | 37.7    | 1.66E-03 |
| 468.1300     | 30.0    | 5.42E-05 | 562.0350     | 24.1    | 3.62E-04 |
| 473.1527     | 37.9    | 6.36E-03 | 563.0689     | 29.9    | 7.00E-04 |
| 474.1883     | 15.0    | 1.64E-01 | 563.9661     | 37.8    | 1.22E-03 |
| 478.2948     | 12.4    | 2.72E-02 | 565.0485     | 30.1    | 1.39E-07 |
| 478.9838     | 30.8    | 5.16E-04 | 565.0748     | 29.7    | 2.18E-03 |
| 479.9883     | 36.6    | 2.76E-03 | 566.0790     | 29.8    | 3.22E-03 |
| 480.9726     | 37.7    | 5.05E-03 | 567.1364     | 2.3     | 1.95E-01 |
| 480.9734     | 31.0    | 1.10E-02 | 569.2738     | 16.4    | 2.03E-02 |
| 485.9892     | 37.8    | 1.14E-04 | 573.2205     | 15.4    | 1.84E-02 |
| 487.1327     | 8.6     | 1.65E-05 | 574.9942     | 17.7    | 9.70E-01 |
| 489.1588     | 2.3     | 1.95E-01 | 575.1434     | 9.5     | 3.53E-03 |
| 494.0474     | 29.8    | 5.63E-08 | 578.0087     | 24.1    | 8.02E-04 |
| 495.1016     | 36.2    | 5.31E-05 | 579.0270     | 36.3    | 8.88E-05 |
| 498.2635     | 12.5    | 1.20E-02 | 580.3618     | 2.7     | 2.79E-02 |
| 500.2788     | 12.5    | 1.32E-02 | 580.3622     | 10.4    | 3.28E-02 |
| 501.2809     | 12.3    | 8.63E-03 | 580.9311     | 37.7    | 1.86E-03 |
| 502.0106     | 30.8    | 3.53E-03 | 581.9769     | 37.9    | 7.09E-05 |
| 503.9998     | 37.9    | 1.40E-05 | 587.0296     | 30.1    | 2.72E-03 |
| 504.0003     | 31.1    | 1.08E-02 | 588.0752     | 31.9    | 3.14E-04 |
| 504.9598     | 37.7    | 3.99E-03 | 591.0257     | 17.6    | 4.24E-01 |
| 506.1885     | 15.4    | 2.20E-01 | 593.1721     | 5.4     | 2.04E-05 |
| 508.4739     | 2.1     | 6.61E-04 | 593.1726     | 3.6     | 6.66E-04 |
| 509.1143     | 8.7     | 2.30E-03 | 595.2895     | 16.3    | 1.90E-02 |
| 509.2894     | 15.5    | 1.46E-02 | 596.5265     | 2.1     | 3.37E-02 |
| 509.3517     | 14.8    | 4.10E-02 | 597.3050     | 16.2    | 2.30E-03 |
| 510.1589     | 8.9     | 1.87E-06 | 600.0316     | 17.0    | 5.23E-01 |
| 513.2051     | 14.6    | 6.30E-05 | 601.0076     | 36.3    | 6.46E-04 |
| 513.3110     | 12.5    | 6.57E-02 | 603.0039     | 30.1    | 5.66E-04 |
| 514.0509     | 17.5    | 5.83E-03 | 603.9585     | 37.9    | 1.13E-03 |
| 516.2539     | 14.8    | 1.81E-02 | 604.0705     | 32.0    | 6.16E-04 |
| 519.9938     | 40.0    | 1.38E-03 | 606.0748     | 29.9    | 1.39E-06 |
| 522.0422     | 30.1    | 2.61E-04 | 608.9888     | 17.8    | 8.89E-01 |
| 522.4893     | 2.1     | 3.14E-02 | 611.1452     | 32.6    | 2.02E-03 |
| 524.2783     | 12.3    | 2.80E-02 | 612.1810     | 16.4    | 1.50E-01 |
| 525.9812     | 37.9    | 4.13E-02 | 613.1406     | 29.2    | 7.54E-05 |
| 526.3149     | 2.7     | 2.79E-02 | 613.1602     | 26.5    | 1.15E-02 |
| 530.3232     | 12.1    | 4.80E-03 | 616.4711     | 10.2    | 1.78E-03 |
| 533.1870     | 9.5     | 5.10E-04 | 616.9834     | 36.3    | 1.44E-02 |
| 534.4895     | 2.1     | 1.48E-03 | 618.5831     | 2.1     | 8.60E-02 |
| 535.0376     | 30.1    | 1.04E-04 | 620.0204     | 35.7    | 1.13E-05 |
| 535.1927     | 9.6     | 1.09E-02 | 621.3034     | 16.2    | 8.76E-03 |
| 535.4934     | 2.1     | 1.28E-02 | 621.9686     | 37.9    | 1.67E-03 |
| 536.5051     | 2.1     | 1.17E-04 | 622.9949     | 36.3    | 1.52E-02 |
| 540.0545     | 24.1    | 1.00E-07 | 624.0660     | 16.5    | 4.78E-01 |
| 540.9390     | 37.7    | 8.72E-03 | 628.0559     | 29.8    | 2.74E-06 |
| 545.1994     | 15.2    | 9.76E-03 | 628.1771     | 16.5    | 7.46E-03 |
| 548.1996     | 16.3    | 1.98E-01 | 632.2045     | 23.1    | 1.56E-05 |
| 550.3619     | 9.6     | 1.06E-04 | 633.1264     | 32.6    | 1.53E-03 |
| 552.2745     | 12.1    | 3.18E-04 | 635.1220     | 29.2    | 1.08E-01 |
| 552.3303     | 2.7     | 5.61E-02 | 635.1411     | 26.5    | 5.27E-02 |

| Compound_m/z | RT(min) | p_value  | Compound_m/z | RT(min) | p_value  |
|--------------|---------|----------|--------------|---------|----------|
| 552.3306     | 10.5    | 3.42E-04 | 635.3209     | 16.1    | 5.32E-01 |
| 554.3459     | 2.7     | 9.14E-02 | 636.9266     | 37.7    | 1.09E-02 |
| 554.3462     | 10.5    | 2.91E-05 | 638.9647     | 36.3    | 3.79E-05 |
| 555.1690     | 9.5     | 1.91E-02 | 639.5573     | 2.0     | 6.91E-01 |
| 642.9037     | 18.2    | 2.43E-02 | 746.5143     | 2.8     | 2.93E-03 |
| 644.0307     | 29.8    | 6.46E-05 | 746.5144     | 11.4    | 4.14E-05 |
| 644.2672     | 15.5    | 1.06E-02 | 747.5187     | 14.0    | 1.31E-05 |
| 644.5987     | 2.1     | 5.88E-03 | 748.5224     | 13.9    | 5.13E-06 |
| 645.0329     | 29.9    | 9.57E-06 | 748.5284     | 6.7     | 7.60E-04 |
| 646.6140     | 2.1     | 1.15E-02 | 748.5284     | 11.4    | 1.60E-02 |
| 649.1005     | 32.6    | 5.46E-02 | 748.5294     | 9.8     | 1.27E-02 |
| 649.3368     | 16.0    | 1.54E-03 | 749.4185     | 16.2    | 2.09E-02 |
| 651.1162     | 26.5    | 1.51E-02 | 750.5437     | 2.8     | 2.16E-02 |
| 653.2086     | 16.4    | 2.99E-01 | 751.4338     | 16.2    | 1.52E-02 |
| 653.5354     | 1.9     | 2.05E-02 | 756.0226     | 29.9    | 1.16E-02 |
| 656.9968     | 17.6    | 9.26E-01 | 757.4855     | 16.4    | 5.12E-02 |
| 657.0038     | 36.3    | 2.15E-03 | 758.4985     | 16.4    | 1.56E-02 |
| 657.1230     | 26.5    | 1.53E-02 | 760.5150     | 16.4    | 2.84E-03 |
| 659.9542     | 37.9    | 1.96E-04 | 761.5809     | 10.2    | 8.75E-02 |
| 662.1019     | 24.1    | 3.22E-05 | 762.0309     | 29.9    | 9.35E-03 |
| 662.2501     | 15.6    | 6.22E-01 | 762.5099     | 11.4    | 7.10E-02 |
| 663.1109     | 39.6    | 2.32E-03 | 762.5127     | 2.9     | 2.57E-02 |
| 664.1176     | 30.4    | 1.39E-03 | 764.0359     | 17.0    | 4.19E-01 |
| 664.4193     | 16.2    | 1.26E-02 | 764.5250     | 11.4    | 1.79E-01 |
| 669.2035     | 16.5    | 1.68E-04 | 764.5250     | 9.8     | 2.34E-01 |
| 670.3479     | 15.0    | 1.35E-01 | 764.5283     | 2.8     | 3.42E-02 |
| 671.4914     | 1.9     | 2.63E-02 | 766.3780     | 12.6    | 5.76E-03 |
| 672.6305     | 2.1     | 1.34E-01 | 766.3841     | 1.9     | 2.72E-01 |
| 673.0971     | 26.6    | 2.71E-02 | 766.5392     | 11.4    | 1.03E-02 |
| 678.2780     | 15.5    | 5.45E-03 | 766.5393     | 2.9     | 1.30E-03 |
| 679.0843     | 39.6    | 2.51E-02 | 766.5395     | 9.8     | 1.62E-01 |
| 682.0337     | 17.0    | 3.85E-01 | 770.3020     | 15.5    | 5.66E-04 |
| 682.5896     | 2.1     | 4.47E-02 | 771.5194     | 13.5    | 1.33E-02 |
| 684.0518     | 30.0    | 4.71E-03 | 773.1978     | 34.9    | 5.08E-05 |
| 686.0998     | 30.4    | 6.43E-03 | 773.5335     | 2.7     | 1.30E-02 |
| 686.1418     | 30.0    | 4.45E-05 | 773.5349     | 13.6    | 1.66E-03 |
| 688.4926     | 9.9     | 1.00E-03 | 775.5485     | 13.8    | 1.46E-04 |
| 688.4927     | 11.6    | 2.34E-02 | 777.4142     | 16.4    | 1.78E-01 |
| 695.0798     | 26.9    | 6.42E-03 | 777.4498     | 16.1    | 2.28E-02 |
| 709.6098     | 2.1     | 8.68E-04 | 778.0049     | 29.8    | 2.52E-03 |
| 714.5085     | 11.6    | 2.86E-02 | 782.4976     | 16.4    | 6.27E-03 |
| 716.5239     | 11.6    | 6.57E-04 | 784.1500     | 30.2    | 1.86E-03 |
| 717.2889     | 15.3    | 1.05E-02 | 784.5126     | 16.4    | 9.79E-03 |
| 718.3791     | 12.6    | 7.22E-02 | 785.5170     | 16.4    | 2.20E-05 |
| 719.4879     | 13.9    | 3.73E-03 | 786.5293     | 16.4    | 1.07E-02 |
| 720.4991     | 11.5    | 1.35E-02 | 788.5449     | 16.4    | 1.62E-03 |
| 722.5138     | 9.8     | 9.91E-03 | 790.5399     | 11.4    | 1.92E-01 |
| 722.5140     | 11.5    | 6.98E-05 | 790.5405     | 9.7     | 2.64E-01 |
| 723.4031     | 16.2    | 1.06E-05 | 790.5581     | 2.9     | 2.04E-04 |
| 730.4666     | 16.4    | 2.74E-02 | 791.3861     | 1.9     | 4.69E-01 |
| 732.4820     | 16.5    | 1.55E-04 | 792.5528     | 11.4    | 1.18E-02 |
| 738.5080     | 11.5    | 1.37E-02 | 793.5034     | 13.3    | 4.38E-02 |
| 738.5083     | 2.8     | 1.73E-01 | 795.5193     | 13.3    | 5.82E-03 |
| 738.5089     | 9.8     | 1.09E-03 | 796.2265     | 26.5    | 2.16E-01 |
| 738.9996     | 17.6    | 8.93E-01 | 797.5346     | 13.5    | 6.06E-02 |
| 740.0482     | 29.9    | 1.20E-03 | 799.5500     | 13.3    | 4.83E-02 |
| 740.3639     | 12.6    | 4.31E-05 | 805.4824     | 15.9    | 9.98E-02 |

| Compound_m/z | RT(min) | p_value  | Compound_m/z | RT(min) | p_value  |
|--------------|---------|----------|--------------|---------|----------|
| 742.0686     | 35.7    | 3.21E-05 | 806.4991     | 16.4    | 2.22E-02 |
| 742.5382     | 9.9     | 4.30E-02 | 807.5025     | 15.3    | 3.29E-03 |
| 742.5401     | 11.5    | 8.22E-02 | 808.4563     | 16.2    | 4.80E-02 |
| 745.5038     | 13.7    | 4.33E-03 | 808.5130     | 16.4    | 1.87E-02 |
| 810.5299     | 16.4    | 7.01E-02 | 919.3522     | 15.6    | 4.41E-01 |
| 811.5336     | 16.4    | 3.13E-02 | 922.4926     | 11.4    | 2.07E-01 |
| 812.5441     | 16.4    | 1.70E-03 | 928.5924     | 10.9    | 2.64E-01 |
| 816.5758     | 2.9     | 1.75E-01 | 935.3807     | 15.5    | 6.55E-02 |
| 817.5039     | 13.0    | 3.21E-03 | 935.5991     | 11.6    | 4.03E-02 |
| 818.5913     | 2.9     | 3.57E-03 | 937.6134     | 11.6    | 3.43E-03 |
| 819.5189     | 13.2    | 3.80E-02 | 938.4894     | 11.4    | 2.97E-01 |
| 824.5465     | 16.4    | 1.48E-04 | 940.5035     | 11.4    | 5.28E-01 |
| 831.1351     | 24.1    | 6.22E-03 | 943.6040     | 11.4    | 2.94E-03 |
| 831.5030     | 15.2    | 4.31E-02 | 943.6296     | 11.6    | 5.81E-04 |
| 832.5062     | 15.1    | 6.91E-02 | 948.5932     | 8.5     | 1.75E-02 |
| 833.5182     | 15.2    | 3.82E-02 | 958.5777     | 8.9     | 3.42E-02 |
| 834.5294     | 16.4    | 1.10E-02 | 959.5809     | 8.9     | 3.70E-02 |
| 835.5350     | 15.2    | 4.61E-06 | 959.6004     | 11.5    | 1.47E-02 |
| 836.5432     | 16.4    | 8.32E-03 | 963.6283     | 11.5    | 2.14E-03 |
| 838.5593     | 16.4    | 1.11E-02 | 964.2059     | 26.6    | 2.34E-03 |
| 839.4159     | 16.0    | 3.73E-03 | 966.5835     | 8.8     | 3.87E-05 |
| 840.5686     | 16.4    | 4.63E-03 | 967.6045     | 11.4    | 4.21E-04 |
| 841.5021     | 12.8    | 2.94E-02 | 968.6549     | 10.1    | 1.53E-01 |
| 842.5891     | 16.4    | 2.45E-03 | 969.6172     | 11.4    | 1.39E-02 |
| 843.5171     | 12.9    | 2.61E-03 | 974.3915     | 15.4    | 5.44E-03 |
| 843.5398     | 15.0    | 1.44E-01 | 974.5572     | 26.7    | 4.09E-03 |
| 844.6074     | 6.8     | 4.23E-02 | 974.6100     | 8.2     | 3.39E-03 |
| 847.1107     | 24.1    | 1.18E-03 | 980.1803     | 26.6    | 1.08E-02 |
| 847.5367     | 15.0    | 2.76E-02 | 982.5786     | 8.9     | 6.16E-02 |
| 855.5023     | 15.0    | 5.71E-02 | 983.6172     | 9.7     | 2.71E-04 |
| 857.5184     | 15.1    | 1.22E-02 | 985.6145     | 11.4    | 6.70E-02 |
| 858.5231     | 15.1    | 3.73E-02 | 985.6305     | 10.0    | 5.33E-02 |
| 859.5331     | 15.1    | 2.90E-02 | 986.6102     | 8.9     | 2.24E-02 |
| 861.5490     | 15.1    | 2.25E-02 | 987.6286     | 11.4    | 9.52E-03 |
| 862.5583     | 16.4    | 3.38E-03 | 988.6190     | 9.3     | 1.79E-02 |
| 865.5033     | 12.9    | 1.31E-01 | 990.5860     | 8.9     | 4.92E-03 |
| 867.5409     | 14.9    | 3.89E-05 | 990.6043     | 9.7     | 8.42E-05 |
| 869.0927     | 24.1    | 3.51E-03 | 991.0901     | 32.5    | 5.65E-06 |
| 869.6756     | 10.0    | 2.67E-03 | 991.2906     | 32.5    | 7.25E-04 |
| 871.6891     | 10.0    | 5.88E-02 | 991.4913     | 32.5    | 2.44E-04 |
| 872.6924     | 10.0    | 4.94E-02 | 991.5879     | 8.9     | 3.48E-02 |
| 873.5535     | 15.0    | 2.65E-02 | 991.6915     | 32.5    | 9.46E-05 |
| 873.6846     | 10.0    | 2.20E-03 | 991.8922     | 32.5    | 4.80E-03 |
| 874.6830     | 10.0    | 2.37E-02 | 992.0926     | 32.5    | 8.15E-04 |
| 875.5253     | 10.1    | 4.11E-02 | 992.5983     | 8.8     | 3.76E-02 |
| 877.6102     | 10.2    | 3.10E-02 | 1004.6463    | 8.0     | 5.30E-02 |
| 878.3942     | 15.3    | 2.57E-03 | 1005.6045    | 9.6     | 3.17E-01 |
| 881.5187     | 15.1    | 5.94E-02 | 1006.5804    | 8.8     | 4.78E-02 |
| 883.5345     | 15.1    | 4.60E-02 | 1008.5947    | 8.9     | 1.47E-01 |
| 885.0669     | 24.1    | 2.72E-04 | 1010.6083    | 8.8     | 7.29E-05 |
| 885.5508     | 15.0    | 1.02E-03 | 1010.6212    | 9.8     | 4.75E-02 |
| 896.4787     | 11.5    | 3.48E-01 | 1011.0865    | 32.5    | 6.58E-03 |
| 898.6002     | 11.6    | 5.77E-03 | 1011.2868    | 32.5    | 2.71E-05 |
| 899.5663     | 14.9    | 9.01E-02 | 1011.4880    | 32.5    | 1.02E-03 |
| 900.5700     | 14.9    | 6.89E-02 | 1018.6137    | 8.8     | 4.30E-01 |
| 901.3703     | 15.5    | 2.27E-02 | 1027.4044    | 15.5    | 7.25E-04 |
| 909.5501     | 15.0    | 4.36E-04 | 1028.6559    | 8.0     | 1.20E-02 |

| <b>Compound_m/z</b> | <b>RT(min)</b> | <b>p_value</b> | <b>Compound_m/z</b> | <b>RT(min)</b> | <b>p_value</b> |
|---------------------|----------------|----------------|---------------------|----------------|----------------|
| 909.5838            | 11.6           | 2.15E-02       | 1031.6210           | 9.6            | 1.23E-02       |
| 911.5638            | 15.0           | 2.60E-03       | 1033.6339           | 9.7            | 4.07E-03       |
| 914.5810            | 15.0           | 1.65E-03       | 1034.6138           | 8.9            | 3.74E-03       |
| 916.5042            | 11.5           | 1.32E-01       | 1066.3233           | 19.6           | 7.94E-04       |
| 1078.7640           | 9.9            | 8.36E-03       | 1239.3636           | 32.5           | 3.46E-05       |
| 1090.6212           | 15.1           | 1.38E-01       | 1239.6142           | 32.5           | 4.78E-07       |
| 1092.6362           | 15.2           | 1.84E-01       | 1239.8652           | 32.5           | 1.36E-03       |
| 1118.6499           | 15.2           | 1.34E-01       | 1240.1156           | 32.5           | 7.73E-04       |
| 1223.2960           | 32.6           | 6.62E-04       | 1325.2095           | 24.1           | 1.88E-03       |
| 1239.1126           | 32.5           | 1.66E-04       |                     |                |                |
